# Supplementary material
Source: PubMed Central journal article supplement (PMC8068623)

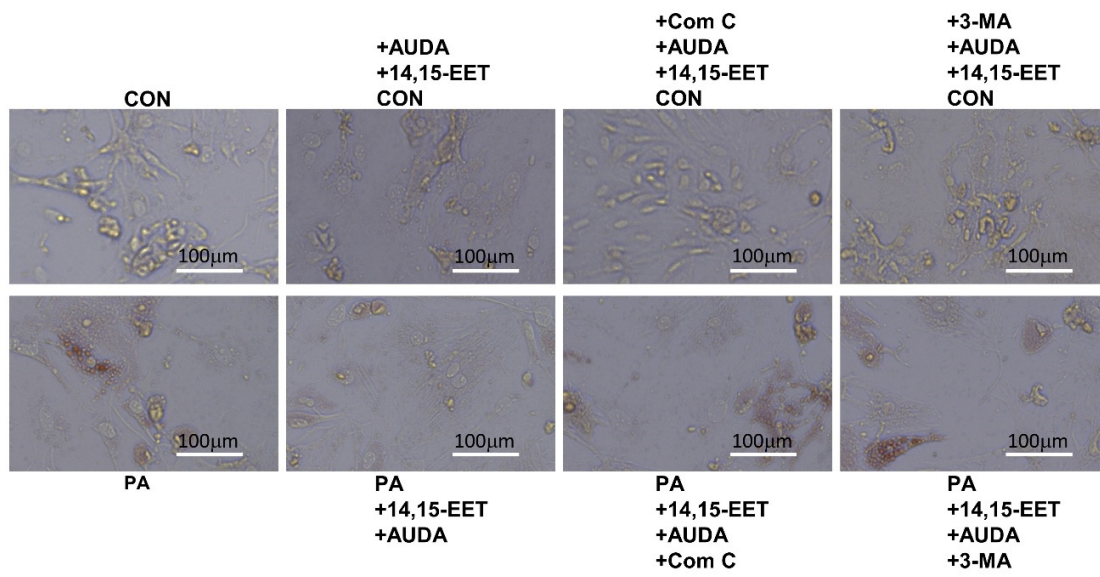

Supplement: NIHMS1673572-supplement-S1.pdf [file NIHMS1673572-supplement-S1.pdf]

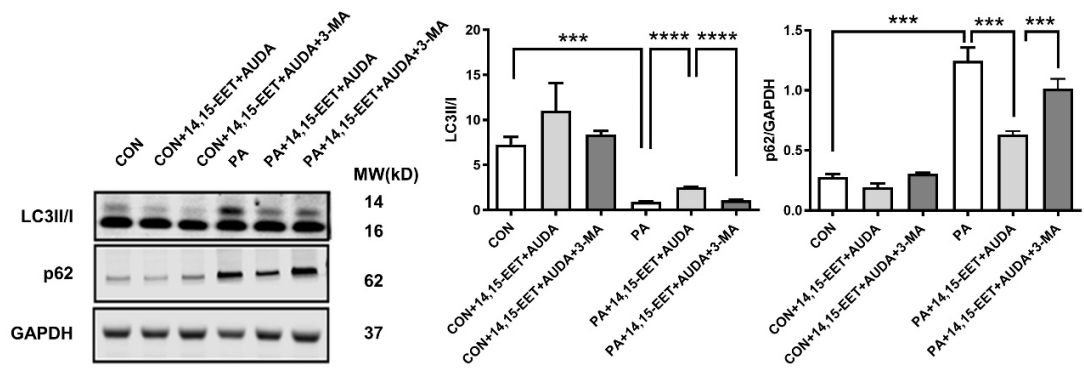

Supplement: NIHMS1673572-supplement-S2.pdf [file NIHMS1673572-supplement-S2.pdf]
